# Supplementary material
Source: PubMed Central journal article supplement (PMC8189545)
Supplement: NIHMS1684710-supplement-Supp_Table_1-4.pdf [file NIHMS1684710-supplement-Supp_Table_1-4.pdf]

**Supplementary Table 1.** Assessment of improvement in the number of annotations of small molecules ( $m/z < 600$  Da) in three public datasets: Global FoodOmics ([MSV000085226](#)), Evaluation dataset ([MSV000083306](#)) and cheetah fecal metabolome dataset ([MSV000082969](#)).

| Dataset                  | # features ( $m/z < 600$ ) | # spectral annotations; cosine score > 0.7 (%) | # fingerprints; Zodiac score > 0.98 (%) | % fingerprints with structures (%) |
|--------------------------|----------------------------|------------------------------------------------|-----------------------------------------|------------------------------------|
| Global FoodOmics         | 1067                       | 210 (19.68)                                    | 663 (62.13)                             | 90.64 (56.32)                      |
| Evaluation dataset       | 5062                       | 953 (18.8)                                     | 4399 (86.90)                            | 91.67 (79.67)                      |
| Cheetah Fecal Metabolome | 903                        | 317 (35.10)                                    | 684 (75.74)                             | 80.40 (60.90)                      |

**Supplementary Table 2.** An assessment of the quality of the CSI:FingerID fingerprint-based chemical classifications in three public datasets: Global FoodOmics ([MSV000085226](#)), Evaluation dataset ([MSV000083306](#)) and cheetah fecal metabolome dataset ([MSV000082969](#)). We report the percent agreement in the chemical taxonomy for the features that had both MS/MS library matches and CSI:FingerID structural annotations.

| Dataset                  | % Kingdom | % Superclass | % Class | % Subclass | % Direct Parent |
|--------------------------|-----------|--------------|---------|------------|-----------------|
| Global FoodOmics         | 100       | 78           | 65      | 66         | 58              |
| Evaluation dataset       | 100       | 86           | 70      | 41         | 26              |
| Cheetah Fecal Metabolome | 100       | 70           | 65      | 58         | 36              |

**Supplementary Table 3.** The composition of samples in the evaluation dataset.

| Sample Name           | Mixture type       | % Fecal_1 | % Fecal_2 | % Tomato | % NIST_1950_SRM |
|-----------------------|--------------------|-----------|-----------|----------|-----------------|
| F1                    | Unmixed            | 100       | 0         | 0        | 0               |
| F1-3_To-1             | Binary mixture     | 75        | 0         | 25       | 0               |
| F1-1_To-1             | Binary mixture     | 50        | 0         | 50       | 0               |
| F1-1_To-3             | Binary mixture     | 25        | 0         | 75       | 0               |
| To                    | Unmixed            | 0         | 0         | 100      | 0               |
| To-3_NIST-1           | Binary mixture     | 0         | 0         | 75       | 25              |
| To-1_NIST-1           | Binary mixture     | 0         | 0         | 50       | 50              |
| To-1_NIST-3           | Binary mixture     | 0         | 0         | 25       | 75              |
| NIST                  | Unmixed            | 0         | 0         | 0        | 100             |
| F2-1_NIST-3           | Binary mixture     | 0         | 25        | 0        | 75              |
| F2-1_NIST-1           | Binary mixture     | 0         | 50        | 0        | 50              |
| F2-3_NIST-1           | Binary mixture     | 0         | 75        | 0        | 25              |
| F2                    | Unmixed            | 0         | 100       | 0        | 0               |
| F1-1_F2-3             | Binary mixture     | 25        | 75        | 0        | 0               |
| F1-1_F2-1             | Binary mixture     | 50        | 50        | 0        | 0               |
| F1-3_F2-1             | Binary mixture     | 75        | 25        | 0        | 0               |
| F1-3_NIST-1           | Binary mixture     | 75        | 0         | 0        | 25              |
| F1-1_NIST-1           | Binary mixture     | 50        | 0         | 0        | 50              |
| F2-1_To-3             | Binary mixture     | 0         | 25        | 75       | 0               |
| F1-1_NIST-3           | Binary mixture     | 25        | 0         | 0        | 75              |
| F2-1_To-1             | Binary mixture     | 0         | 50        | 50       | 0               |
| F2-3_To-1             | Binary mixture     | 0         | 75        | 25       | 0               |
| F1-2_F2-1_NIST-1_To-1 | Quaternary mixture | 40        | 20        | 20       | 20              |
| F1-1_F2-1_NIST-1_To-2 | Quaternary mixture | 20        | 20        | 40       | 20              |
| F1-1_F2-1_NIST-2_To-1 | Quaternary mixture | 20        | 20        | 20       | 40              |
| F1-1_F2-2_NIST-1_To-1 | Quaternary mixture | 20        | 40        | 20       | 20              |
| F1-1_F2-1_NIST-1_To-1 | Quaternary mixture | 25        | 25        | 25       | 25              |

**Supplementary Table 4.** A comparison of Bray-Curtis, CSCS, Cosine-UniFrac, Fingerprint-UniFrac for clustering samples in Global Foodomics dataset (N=126). The distances within- and between-sample groupings were compared using a one-sided permutational ANOVA (PERMANOVA) test; pseudo F-statistic are shown below.

| Metadata Column       | <b>Bray-Curtis</b> | CSCS    | Cosine-UniFrac | Fingerprint-UniFrac |
|-----------------------|--------------------|---------|----------------|---------------------|
| Food ontology level 1 | 4.33612            | 4.63819 | 4.82414        | 5.34768             |
| Food ontology level 2 | 4.22387            | 4.53509 | 4.75484        | 5.15483             |
| Food ontology level 3 | 4.28973            | 4.74771 | 4.73052        | 4.85554             |
| Food ontology level 4 | 4.30789            | 5.76645 | 5.038          | 5.35642             |
